# Supplementary material
Source: MDPI journal article supplement (https://www.mdpi.com/2079-9276/9/9/99)
Supplement: s1 [file s1]

**Supplementary Materials:**
**Table 1.** List of reviewed publications.

| Title                                                                                                                                                                                                                                                         | Authors                                                                         | Year | Type of Publication | Geographic coverage | Focus (topic)         | Cities |
|---------------------------------------------------------------------------------------------------------------------------------------------------------------------------------------------------------------------------------------------------------------|---------------------------------------------------------------------------------|------|---------------------|---------------------|-----------------------|--------|
| A menu of actions to shape urban food environments for improved nutrition                                                                                                                                                                                     | Halliday, J.,<br>Platenkamp, L.,<br>Nicolarea, Y                                | 2019 | Book                | global              | Urban food governance |        |
| A theory-based evaluation of food waste policy: Evidence from Italy                                                                                                                                                                                           | Busetti, S.                                                                     | 2019 | Peer reviewed       | Local               | Food waste            |        |
| Addressing food-related consumption -based emissions in C40 cities                                                                                                                                                                                            | University of Leeds, C40, ARUP                                                  | 2019 | Grey                | Global              | Food waste            |        |
| Automatically green: Behavioral economics and environmental protection                                                                                                                                                                                        | Sunstein, C., R.;<br>Reisch, L.                                                 | 2014 | Peer reviewed       | global              | Food Waste            |        |
| Bringing a Sharing Economy Approach into the Food Sector: The Potential of Food Sharing for Reducing Food Waste.                                                                                                                                              | Falcone, P.M.;<br>Imbert, E. ;<br>Morone, P.,<br>Papendiek, F.,<br>Tartiu, V.E. | 2017 | Peer reviewed       | Global              | Food waste            |        |
| Bruges: food waste reduction in healthcare institutions                                                                                                                                                                                                       | FAO; Està; City of Bruges                                                       | 2018 | Grey                | Local               | Food waste            | X      |
| CITIES AND CIRCULAR ECONOMY FOR FOOD                                                                                                                                                                                                                          | Ellen Mac Arthur Foundation                                                     | 2019 | Grey                | Global and local    | Food waste            |        |
| Cities talking about food policy during crisis                                                                                                                                                                                                                | EUROCITIES                                                                      | 2020 | Grey                | Local               | Wider scope           | X      |
| City Region Food Systems and Food Waste Management                                                                                                                                                                                                            | Dubbeling, M. et al                                                             | 2016 | Grey                | Global              | Food waste            |        |
| Commission delegated decision (EU) 2019/1597 of 3 May - supplementing Directive 2008/98/EC of the European Parliament and of the Council as regards a common methodology and minimum quality requirements for the uniform measurement of levels of food waste | European Commission                                                             | 2019 | Grey                | European            | Food waste            |        |
| Creative construction: crafting, negotiating and performing urban food sharing landscapes.                                                                                                                                                                    | Davies et al.                                                                   | 2017 | Peer reviewed       | Global              | Food waste            |        |
| Cremona                                                                                                                                                                                                                                                       | MUFPP Best Practice                                                             | 2019 | Grey                | Local               | Food waste            | X      |

|                                                                                                                                 |                                                        |      |               |          |                       |   |
|---------------------------------------------------------------------------------------------------------------------------------|--------------------------------------------------------|------|---------------|----------|-----------------------|---|
| Detecting drivers of household food waste in Italy: methodological assessment of a diary study                                  | Giordano et al.                                        | 2016 | Peer reviewed | Local    | Food waste            |   |
| Drivers of Food Wastage and their Implications for Sustainable Policy Development                                               | Thyberg, K. L.;<br>Tonjes, D. J.                       | 2016 | Peer reviewed | Global   | Food waste            |   |
| Economic impact assessment of food waste reduction on European countries through social accounting matrices                     | Munoz et al                                            | 2017 | Peer reviewed | european | Food Waste            |   |
| Estimates of European food waste levels                                                                                         | Stenmark, A. et al                                     | 2016 | Grey          | European | Food Waste            |   |
| Estimating urban food waste at the local level: are good practices in food consumption persistent?                              | Cerciello, M.; et al                                   | 2018 | Peer reviewed | Local    | Food Waste            |   |
| European cities leading in urban food systems transformation: connecting Milan & FOOD 2030                                      | Magarini, A.;<br>Porreca E.                            | 2019 | Grey          | European | Urban food governance | X |
| Feeding cities Putting food on the urban planning agenda                                                                        | Fattibene, D.;<br>Maci, G.; Santini,<br>G.             | 2019 | Grey          | Local    | urban Food Governance |   |
| Fighting against Food Losses and Waste: An EU Agenda                                                                            | Fattibene, D.;<br>Bianchi, M.                          | 2017 | Grey          | european | Food Waste            |   |
| Five ways to make cities healthier and more sustainable Cities are growing – and so is the opportunity to make them sustainable | FAO                                                    | 2020 | Grey          | Global   | Urban Food Governance |   |
| FOOD & CITIES The Role of Cities for Achieving the Sustainable Development Goals                                                | Barilla<br>Foundation;<br>Milan Food Policy<br>Office; | 2018 | Grey          | Global   | Wider scope           | X |
| Food & Cities. The role of cities for achieving the Sustainable Development Goals                                               | BCFN, MUFPP                                            | 2018 | Grey          | global   | Food Waste            |   |
| Food losses and waste Issues and policy options                                                                                 | Bellu, L.G.                                            | 2018 | Grey          | Global   | Food waste            |   |
| Food Losses and Waste in European Cities                                                                                        | Magarini, A.; De<br>Cunto, A.;<br>Porreca, E.          | 2018 | Grey          | european | Food Waste            | X |
| Food security governance: a systematic literature review                                                                        | Candel, J.J.L.                                         | 2014 | Peer reviewed | Global   | urban Food Governance |   |
| Food wastage footprint Full-cost accounting                                                                                     | FAO                                                    | 2014 | Grey          | Global   | Food waste            |   |
| Food wastage footprint Impacts on natural resources                                                                             | FAO                                                    | 2013 | Grey          | Global   | Food waste            |   |

|                                                                                 |                                                     |      |               |          |                       |   |
|---------------------------------------------------------------------------------|-----------------------------------------------------|------|---------------|----------|-----------------------|---|
| Food wastage: a systemic approach for structural prevention and reduction       | ISPRA                                               | 2018 | Book          | global   | Food Waste            |   |
| Food Waste at Consumer Level                                                    | Principato, L.                                      | 2018 | Book          | Global   | Food Waste            |   |
| Food waste quantification manual to monitor food waste amounts and progression. | Tostivint et al.                                    | 2016 | Peer reviewed | Global   | Food waste            |   |
| Food Waste: Causes, impacts, proposals                                          | BCFN                                                | 2012 | Grey          | global   | Food Waste            |   |
| From farm to landfill: how Rome tackles its food waste                          | Fattibene, D.                                       | 2018 | Grey          | Local    | Food waste            |   |
| FUSIONS Definitional Framework for Food Waste                                   | Östergren, K. et al                                 | 2014 | Grey          | european | Food Waste            |   |
| FUSIONS definitional framework for food waste                                   | Östergren et al.                                    | 2014 | Grey          | Local    | Food waste            |   |
| Ghent: Foodsavers platform                                                      | FAO, Està, City of Ghent                            | 2018 | Grey          | Local    | Food Waste            | X |
| Global Food losses and food waste                                               | FAO                                                 | 2011 | Grey          | Global   | Food waste            |   |
| Guidelines on the preparation of food waste prevention programmes               | BioIntelligence service, European Commission DG ENV | 2011 | Grey          | European | Food waste            |   |
| Il sistema del cibo a Milano: Cinque priorità per uno sviluppo sostenibile      | City of Milan; Cariplo Foundation; Esta             | 2018 | Grey          | Local    | Wider scope           | X |
| Integrating Food into Urban Planning                                            | MUFPP, RUAFA, GAIN                                  | 2019 | Book          | global   | Urban food governance |   |
| Liège: Raising food waste awareness                                             | MUFPP Best Practice                                 | 2019 | Grey          | Local    | Food waste            | X |
| Ljubljana: planning for short food supply chains                                | FAO, Està, City of Ljubljana                        | 2018 | Grey          | Local    | Food Waste            | X |
| Ljubljana: planning for short food supply chains                                | FAO; Està                                           | 2018 | Grey          | Local    | Food waste            | X |
| Milan: a comprehensive food policy to tackle food waste                         | FAO, Està, Municipality of Milan                    | 2018 | Grey          | Local    | Food Waste            | X |
| MONTPELLIER SPECIAL MENTION 2019 ON FOOD SUPPLY & DISTRIBUTION                  | MUFPP Best Practice                                 | 2019 | Grey          | Local    | Food waste            | x |
| More Responsible Food Consumption. Proposals to Prevent and Avoid Food Wastage  | Agencia de Residus de Catalunya                     | 2012 | Grey          | Local    | Food Waste            |   |
| New Urban Agenda                                                                | United Nations                                      | 2017 | Grey          | Global   | Urban Food Governance |   |

|                                                                                                                   |                                                      |      |               |          |                       |   |
|-------------------------------------------------------------------------------------------------------------------|------------------------------------------------------|------|---------------|----------|-----------------------|---|
| Nutritional and environmental losses embedded in global food waste                                                | Chen, C.;<br>Chaudhary, A.;<br>Mathys, A.            | 2020 | Peer reviewed | Global   | Food waste            |   |
| Our world is urbanizing Is food on your agenda?                                                                   | FAO                                                  | 2018 | Grey          | Global   | Urban Food Governance |   |
| Overview of Food System Issues: Snapshot of the Los Angeles Regional Food System                                  | Los Angeles Food Policy Council                      | 2013 | Grey          | Local    | Urban Food Governance |   |
| Per un'Italia sostenibile: l'SDSN Italia SDGs City Index 2018                                                     | FEEM                                                 | 2018 | Grey          | National | SDG Index             |   |
| Policy recommendations to improve food waste prevention and valorisation in the EU                                | Bos-Brouwers, H.                                     | 2020 | Peer reviewed | european | Food Waste            |   |
| Quality Food, Public Procurement, and Sustainable Development: The School Meal Revolution in Rome                 | Sonnino, R.                                          | 2009 | Peer reviewed | Local    | Urban food governance |   |
| Reducing Food Loss and Waste                                                                                      | Lipinski et al.                                      | 2013 | Peer reviewed | Global   | Food waste            |   |
| Reducing Food Loss And Waste Setting A Global Action Agenda                                                       | Flanagan et al                                       | 2019 | Grey          | global   | Food Waste            |   |
| Relationalities and convergences in food security narratives: towards a place based approach.                     | Sonnino, R.;<br>Marsden, T.;<br>Moragues Faus,<br>A. | 2016 | Peer reviewed | Global   | Wider scope           |   |
| RePoP – Progetto Organico Porta Palazzo                                                                           | Comune di Torino                                     | 2018 | Grey          | Local    | Food waste            | X |
| Riga: from food waste to healthy off-season food                                                                  | FAO, Esta,<br>Municipality of Riga                   | 2018 | Grey          | Local    | Food Waste            | X |
| Sustainable Consumption for Food and Nutrition Security in the MENA Region                                        | El Labban, S.                                        | 2017 | Peer reviewed | Global   | Sustainable Diets     |   |
| Sustainable Consumption Policies Effectiveness Evaluation (SCOPE2) Inventory and assessment of policy instruments | Lorek, S. et al                                      | 2008 | Grey          | european | Food Waste            |   |
| Sustainable food consumption: an overview of contemporary issues and policies                                     | Reisch, L.; et al                                    | 2017 | Peer reviewed | global   | Food Waste            |   |
| Sustainable management practices of food waste in Asia: Technological and policy drivers                          | Joshi P.                                             | 2019 | Peer reviewed | Local    | Food waste            |   |
| Tackling Food Waste through a sharing economy approach: an experimental analysis                                  | Morone et al.                                        | 2020 | Peer reviewed | Global   | Food waste            |   |
| The "REDUCE" project: definition of a methodology for quantifying                                                 | Tua, C.; Grosso,<br>M.; Nessi, S.                    | 2017 | Peer reviewed | Local    | Food waste            |   |

|                                                                                                                                 |                                             |      |               |          |                       |  |   |
|---------------------------------------------------------------------------------------------------------------------------------|---------------------------------------------|------|---------------|----------|-----------------------|--|---|
| food waste by means of targeted waste composition analysis.                                                                     |                                             |      |               |          |                       |  |   |
| The 2019 SDG Index and Dashboards Report for European Cities (prototype version)                                                | SDSN                                        | 2019 | Grey          | European | SDG Index             |  |   |
| The challenge of systemic food change: Insights from cities                                                                     | Sonnino, R.; Tegoni, C.; De Cunto A.        | 2019 | Peer reviewed | Local    | urban Food Governance |  |   |
| The contribution of Urban Food Policies toward food security in developing and developed countries: A network analysis approach | Filippini, R.; Mazzocchi, C.; Corsi, S.     | 2019 | Peer reviewed | Local    | Urban Food Governance |  |   |
| The cultural dynamics of urban food governance                                                                                  | Sonnino, R.                                 | 2019 | Peer reviewed | Local    | Urban Food Governance |  |   |
| The devolution of urban food waste governance: Case study of food rescue in Los Angeles                                         | Warshawky, D. N.                            | 2015 | Peer reviewed | Local    | Urban Food Governance |  |   |
| The European Action against Food Loss and Waste: Co-Regulation and Collisions on the Way to the Sustainable Development Goals   | Ferrando, T.; Mansuy, J.                    | 2018 | Peer reviewed | European | Food Waste            |  |   |
| THE MILAN URBAN FOOD POLICY PACT MONITORING FRAMEWORK                                                                           | FAO, MUFPP, RUAF                            | 2019 | Grey          | global   | Food Waste            |  |   |
| The Milan Urban Food Policy Pact Monitoring Framework                                                                           | FAO; MUFPP; RUAF                            | 2019 | Grey          | Global   | Urban food governance |  |   |
| The new geography of food security: exploring the potential of urban food strategies                                            | Sonnino, R.                                 | 2014 | Peer reviewed | Local    | Urban Food Governance |  |   |
| The role of cities in the transformation of food systems: sharing lessons from Milan Pact cities                                | Giordano, T. et al                          | 2018 | Grey          | Global   | Urban Food Governance |  | X |
| The School Food Revolution: Public Food and the Challenge of Sustainable Development                                            | Morgan, K.; Sonnino, R.                     | 2008 | Peer reviewed | Global   | Wider scope           |  |   |
| The water-energy-food nexus: An integration agenda and implications for urban governance                                        | Artioli, F.; Acuto, M.; Mc Arthur, J.       | 2017 | Peer reviewed | Global   | Urban Food Governance |  |   |
| Understanding Food Sharing Models to Tackle Sustainability Challenges.                                                          | Michelini, L.; Principato, L.; Iasevoli, G. | 2018 | Peer reviewed | Global   | Food waste            |  |   |
| Updated Bioeconomy Strategy 2018                                                                                                | GERLACH, H.                                 | 2018 | Grey          | Local    | Wider scope           |  |   |
| Urban Agenda for the EU Pact of Amsterdam                                                                                       | European Union                              | 2016 | Grey          | European | Urban Food Governance |  |   |

|                                                                                               |                            |      |               |                  |                       |
|-----------------------------------------------------------------------------------------------|----------------------------|------|---------------|------------------|-----------------------|
| Urban Agriculture Magazine no. 36 – Food Policy Councils                                      | RUAF                       | 2019 | Peer reviewed | Global and local | Urban Food Governance |
| Urban food policies in German city regions: An overview of key players and policy instruments | Doernberg, et al           | 2019 | Peer reviewed | Local            | Urban food governance |
| Urban growth and waste management optimization towards ‘zero waste city                       | Zaman, A.U;<br>Lehmann, S. | 2011 | Peer reviewed | Global           | Food waste            |
| What a waste 2.0: A global snapshot of solid waste management to 2050                         | Kaza S., et al.            | 2018 | Peer reviewed | Global           | Food waste            |
| What will we eat tomorrow                                                                     | Rikolto                    | 2019 | Grey          | Global           | Urban Food Governance |

**Source: Authors’ elaboration**

**Table 2.** Summary of the case studies analysed.

| City      | Country         | Types of Policies (What)                                            | Areas of intervention (How)               | Actors involved (Who)                                              | SDGs        |
|-----------|-----------------|---------------------------------------------------------------------|-------------------------------------------|--------------------------------------------------------------------|-------------|
| Almere    | The Netherlands | Information-based Policies; Voluntary Agreements; Social Protection | Food Donations; Education                 | Retailers, Citizens                                                | 1,2,4,12,17 |
| Amsterdam | The Netherlands | Information-Based Policies; Social Protection                       | Food Donations; Education                 | City Authorities; Retailers; Charities; Schools                    | 2,4,8,12,17 |
| Athens    | Greece          | Regulatory Policies;                                                | Circular Economy                          | City Authorities; Waste Management Company                         | 11,12,17    |
| Barcelona | Spain           | Information Based                                                   | Education                                 | City Authorities, Markets; University                              | 4,12,17     |
| Bari      | Italy           | Food Sharing; Information Based                                     | Digital, Education, Food donations        | Charities, Citizens                                                | 2,4,12,17   |
| Bologna   | Italy           | Food Sharing                                                        | Digital, Food donations                   | Citizens                                                           | 12,17       |
| Bordeaux  | France          | Regulatory; Social protection                                       | Circular Economy, Employment              | Restaurants, City Authorities, Citizens                            | 8,12,17     |
| Bruges    | Belgium         | Information-Based Policies; Voluntary Agreements; Social Protection | Food Donations; Education                 | City Authorities, Hospitals, Charities                             | 1,2,3,12,17 |
| Brussels  | Belgium         | Regulatory; Information Based                                       | Supporting Short Supply Chains; Education | City Authorities, Restaurants, Citizens, Schools                   | 8,11,12,17  |
| Burgas    | Bulgaria        | Regulatory                                                          | Circular Economy                          | Restaurants, Retailers, City Authorities, Waste Management Company | 11,12,17    |

|            |          |                                                                                                        |                                                                    |                                                                                              |                   |
|------------|----------|--------------------------------------------------------------------------------------------------------|--------------------------------------------------------------------|----------------------------------------------------------------------------------------------|-------------------|
| Cremona    | Italy    | Information-Based Policies; Social Protection; Voluntary Agreements; Food Sharing; Regulatory Policies | Food Donations; Digital; Supporting Short Supply Chains; Education | City Authorities; Schools; Retailers; Charities; Prisoners                                   | 1,2,4,11,12,13,17 |
| Dublin     | Ireland  | Regulatory; Information Based                                                                          | Circular Economy; Education                                        | City Authorities, Citizens                                                                   | 4,11,12,17        |
| Genoa      | Italy    | Information Based; Social Protection, Food Sharing                                                     | Education; Food donations                                          | City Authorities, Charities                                                                  | 2,4,12,17         |
| Ghent      | Belgium  | Information-Based Policies; Regulatory Policies; Social Protection; Food Sharing                       | Food Donations, Education, Digital                                 | City Authorities, Markets, Charities, Restaurants, Retailers, Citizens                       | 1,2,8,12,17       |
| Gothenburg | Sweden   | Information-Based Policies; Regulatory Policies                                                        | Education                                                          | City Authorities, Schools<br>Citizens                                                        | 4,11,12,17        |
| Helsinki   | Finland  | Regulatory Policies                                                                                    | Circular Economy; Digital                                          | City Authorities, Waste Management Company, integrated governance (Regional Waste Authority) | 1,7,9,12,17       |
| Katowice   | Poland   | Voluntary                                                                                              | Food donations                                                     | Restaurants, Retailers, City Authorities                                                     | 2,12,17           |
| Leipzig    | Germany  | Food Sharing                                                                                           | Food donations                                                     | Citizens                                                                                     | 2,12,17           |
| Liège      | Belgium  | Regulatory Policies; Information-Based Policies                                                        | Education                                                          | Schools; Waste Management Company; Citizens                                                  | 4,12,17           |
| Lille      | France   | Social Protection                                                                                      | Food donations                                                     | City Authorities, Citizens, Charities                                                        | 2,12,17           |
| Linköping  | Sweden   | Regulatory Policies                                                                                    | Circular Economy                                                   | City Authorities; Waste Management Company; Farmers/Producers; Transport Company             | 2,7,12,17         |
| Ljubljana  | Slovenia | Information-Based Policies; Regulatory Policies; Social Protection; Market-Based Policies              | Promoting Short Supply Chains; Education; Fiscal Incentives        | City Authorities, Farmers/Producers, Markets, Citizens, Schools                              | 2,4,8,12,17       |
| Lyon       | France   | Food Sharing                                                                                           | Food donations; Digital                                            | City Authorities, Charities, Retailers, Start up                                             | 2,12,17           |

|                 |                 |                                                                                                                                |                                                                     |                                                                                                                                               |                      |
|-----------------|-----------------|--------------------------------------------------------------------------------------------------------------------------------|---------------------------------------------------------------------|-----------------------------------------------------------------------------------------------------------------------------------------------|----------------------|
| Malmö           | Sweden          | Information Based                                                                                                              | Circular Economy                                                    | City Authorities, Transport<br>Company, Waste<br>Management Company,<br>Citizens                                                              | 7,11,12,17           |
| Milan           | Italy           | Information-Based<br>Policies; Market-Based<br>Policies; Regulatory<br>Policies; Voluntary<br>Agreements; Social<br>Protection | Food Donations;<br>Taxes Reduction;<br>Education; Digital           | City Authorities, Schools,<br>Charities; Citizens;<br>Markets; Waste<br>Management Company,<br>Retailers;<br>Farmers/Producers;<br>University | 4,11,12,17           |
| Montpellier     | France          | Information-Based<br>Policies; Regulatory<br>Policies                                                                          | Supporting Short<br>Supply Chains                                   | City Authorities; Citizens;<br>Retailers; Restaurants;<br>Schools                                                                             | 2,4,12,17            |
| Paris           | France          | Food Sharing                                                                                                                   | Food donations                                                      | City Authorities, Markets,<br>Charities, Citizens                                                                                             | 2,4,12,17            |
| Porto           | Portugal        | Information Based                                                                                                              | Education                                                           | Chefs, Citizens, Schools                                                                                                                      | 4,12,17              |
| Prague          | Czechia         | Regulatory; Voluntary                                                                                                          | Circular Economy                                                    | Canteens, Restaurants,<br>Waste Management<br>Company, Charities,<br>Citizens                                                                 | 7,11,12,17           |
| Riga            | Latvia          | Information-Based<br>Policies; Regulatory<br>Policies; Social<br>Protection                                                    | Promoting Short<br>Supply Chains;<br>Circular Economy;<br>Education | City Authorities, Waste<br>Management Company,<br>Retailers;<br>Farmers/Producers;<br>Citizens                                                | 1,7,8,12,17          |
| s-Hertogenbosch | The Netherlands | Information-Based<br>Policies; Voluntary<br>Agreements                                                                         | Food Donations;<br>Digital; Education                               | City Authorities, Schools<br>Restaurants; Retailers;<br>Citizens                                                                              | 7,12,17              |
| Sofia           | Bulgaria        | Regulatory                                                                                                                     | Circular Economy                                                    | City Authorities, Waste<br>Management Company                                                                                                 | 11,12,17             |
| The Hague       | The Netherlands | Food Sharing;<br>Information Based                                                                                             | Digital; Circular<br>Economy, Education                             | Citizens, Waste<br>Management Company                                                                                                         | 4,11,12,17           |
| Tilburg         | The Netherlands | Voluntary                                                                                                                      | Circular Economy                                                    | City Authorities,<br>Restaurants, Charities,<br>Canteens                                                                                      | 11,12,17             |
| Toulouse        | France          | Food Sharing                                                                                                                   | Food donations                                                      | Caterers                                                                                                                                      | 2,12,17              |
| Turin           | Italy           | Information-Based<br>Policies; Regulatory<br>Policies; Integration<br>Based Policies                                           | Education, Food<br>Donations                                        | City Authorities, Markets,<br>Citizens, Charities                                                                                             | 1,2,4,8,11,<br>12,17 |
| Utrecht         | The Netherlands | Information Based;<br>Voluntary                                                                                                | Circular Economy;<br>Education                                      | City Authorities, Students                                                                                                                    | 4,12,17              |
| Valladolid      | Spain           | Regulatory Policies                                                                                                            | Circular economy of<br>food                                         | City Authorities, Waste<br>Management Company;                                                                                                | 12,17                |



|          |       |                                    |                            |                                                                       |         |
|----------|-------|------------------------------------|----------------------------|-----------------------------------------------------------------------|---------|
|          |       |                                    |                            | Markets;<br>Farmers/Producers                                         |         |
| Venice   | Italy | Voluntary: Social<br>protection    | Food donations             | Hotels Citizens, Charities,<br>Retailers                              | 2,12,17 |
| Zaragoza | Spain | Social Protection; Food<br>Sharing | Food donations,<br>Digital | City Authorities, Bank,<br>Private Foundation,<br>Citizens, Charities | 2,12,17 |

**Source: Authors' elaboration**
